# Supplementary material
Source: ML conference proceedings conference paper supplement (https://openaccess.thecvf.com/content/CVPR2022/html/Gorti_X-Pool_Cross-Modal_Language-Video_CVPR_2022_paper.html)
Supplement: Supplementary file 1 [file Gorti_X-Pool_Cross-Modal_Language-Video_CVPR_2022_supplemental.pdf]

# Appendices

## A. Video-to-Text Retrieval Results

| Methods                 | R@1 $\uparrow$ | R@5 $\uparrow$ | R@10 $\uparrow$ | MdR $\downarrow$ | MnR $\downarrow$ |
|-------------------------|----------------|----------------|-----------------|------------------|------------------|
| CE [6]                  | 20.6           | 50.3           | 64.0            | 5.3              | 25.1             |
| MMT [3]                 | 27.0           | 57.5           | 69.7            | 3.7              | 21.3             |
| Straight-CLIP [10]      | 27.2           | 51.7           | 62.6            | 5.0              | -                |
| Support Set [9]         | 28.5           | 58.6           | 71.6            | 3.0              | -                |
| TeachText-CE+ [2]       | 32.1           | 62.7           | 75.0            | 3.0              | -                |
| CLIP4Clip-meanP [7]     | 43.1           | 70.5           | 81.2            | <b>2.0</b>       | 12.4             |
| CLIP4Clip-seqTransf [7] | 42.7           | 70.9           | 80.6            | <b>2.0</b>       | 11.6             |
| X-Pool (ours)           | <b>44.4</b>    | <b>73.3</b>    | <b>84.0</b>     | <b>2.0</b>       | <b>9.0</b>       |

Table A1.  $v2t$  results on the MSR-VTT-9K dataset.

| Methods                 | R@1 $\uparrow$ | R@5 $\uparrow$ | R@10 $\uparrow$ | MdR $\downarrow$ | MnR $\downarrow$ |
|-------------------------|----------------|----------------|-----------------|------------------|------------------|
| Straight-CLIP [10]      | 59.9           | 85.2           | 90.7            | <b>1.0</b>       | -                |
| TeachText-CE+ [2]       | 27.1           | 55.3           | 67.1            | 4.0              | -                |
| CLIP4Clip-meanP [7]     | 56.6           | 79.7           | 84.3            | <b>1.0</b>       | 7.6              |
| CLIP4Clip-seqTransf [7] | 62.0           | 87.3           | 92.6            | <b>1.0</b>       | 4.3              |
| X-Pool (ours)           | <b>66.4</b>    | <b>90.0</b>    | <b>94.2</b>     | <b>1.0</b>       | <b>3.3</b>       |

Table A2.  $v2t$  results on the MSVD dataset.

| Methods                 | R@1 $\uparrow$ | R@5 $\uparrow$ | R@10 $\uparrow$ | MdR $\downarrow$ | MnR $\downarrow$ |
|-------------------------|----------------|----------------|-----------------|------------------|------------------|
| JSFusion [11]           | 12.3           | 28.6           | 38.9            | 20.0             | -                |
| Straight-CLIP [10]      | 6.8            | 16.4           | 22.1            | 73.0             | -                |
| TeachText-CE+ [2]       | 17.5           | 36.0           | 45.0            | 14.3             | -                |
| CLIP4Clip-meanP [7]     | 20.6           | 39.4           | 47.5            | 13.0             | 56.7             |
| CLIP4Clip-seqTransf [7] | 20.8           | 39.0           | 48.6            | 12.0             | 54.2             |
| X-Pool (ours)           | <b>22.7</b>    | <b>42.6</b>    | <b>51.2</b>     | <b>10.0</b>      | <b>47.4</b>      |

Table A3.  $v2t$  results on the LSMDC dataset.

## B. Number of Frames Experiment

Our experiments use 12 sampled frames by default following recent text-video retrieval literature [7], and we run additional experiments on the MSR-VTT-9K dataset by varying the number of sampled frames for both training and inference as shown in Figure B1. We observe worse performance for 6 frames likely due to important information being missing at this scale. As we increase the number of frames<sup>1</sup>, we observe performance saturation which is consistent with findings in [7]. However, we note that the optimal number of sampled frames remains a dataset specific hyperparameter.

## C. Online Inference in a Large-Scale Production System

Since our model computes an aggregated video embedding conditioned on a given text, the embeddings from a

<sup>1</sup>“All” indicates inference with all frames at inference time after training on 12 sampled frames.

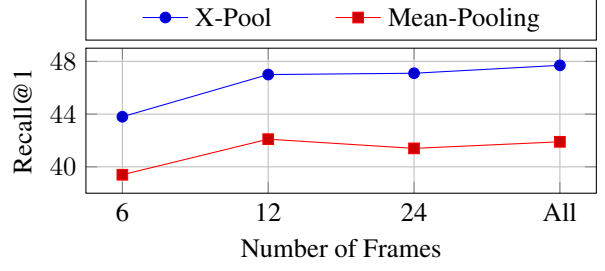

Figure B1.  $t2v$  Recall@1 results on the MSR-VTT-9K dataset when varying the number of frames. “All” indicates inference with all frames.

video index set in  $t2v$  cannot be entirely pre-computed because query texts are not a priori known during online inference. Instead, we can only pre-compute the frame embeddings of each index video, so fast nearest neighbour retrieval techniques [4, 5] cannot be readily applied. To address this in a production system with large-scale index sets, one commonly used approach is to use a high recall method to obtain a set of top retrieval candidates using a nearest-neighbour search, and then use another method yielding high precision to re-rank the candidates [1, 8].

In our case, we can first mean-pool the pre-computed frame embeddings coming from X-Pool and then very efficiently obtain a set of  $\mathcal{P}$  most similar candidates from the index set given a retrieval query. We can then run X-Pool’s text-conditioned attention mechanism only on said candidates and then re-rank them for retrieval. That way, given  $\mathcal{T}$  text queries and  $\mathcal{V}$  index videos in  $t2v$ , instead of an  $\mathcal{O}(\mathcal{T}\mathcal{V})$  complexity, we can achieve an  $\mathcal{O}(\mathcal{T}\mathcal{P} + \mathcal{V})$  complexity where  $\mathcal{P} \ll \mathcal{V}$  while maintaining good performance. In fact, we evaluated the performance of our model on the MSR-VTT dataset using the top-100 candidates from mean-pooling (i.e.  $\mathcal{P} = 100$ ) and obtained the same performance in Recall@1, Recall@5 and Recall@10 as listed in our main results.

## References

- [1] Paul Covington, Jay Adams, and Emre Sargin. Deep neural networks for youtube recommendations. In *Proceedings of the 10th ACM conference on recommender systems*, pages 191–198, 2016. 1
- [2] Ioana Croitoru, Simion-Vlad Bogolin, Marius Leordeanu, Hailin Jin, Andrew Zisserman, Samuel Albanie, and Yang Liu. Teachtext: Crossmodal generalized distillation for text-video retrieval. In *Proceedings of the IEEE/CVF International Conference on Computer Vision*, pages 11583–11593, 2021. 1
- [3] Valentin Gabeur, Chen Sun, Karteek Alahari, and Cordelia Schmid. Multi-modal transformer for video retrieval. In *Computer Vision–ECCV 2020: 16th European Conference, Glasgow, UK, August 23–28, 2020, Proceedings, Part IV 16*, pages 214–229. Springer, 2020. 1

- [4] Jeff Johnson, Matthijs Douze, and Hervé Jégou. Billion-scale similarity search with gpus. *IEEE Transactions on Big Data*, 2019. [1](#)
- [5] Ting Liu, Andrew W Moore, Alexander G Gray, and Ke Yang. An investigation of practical approximate nearest neighbor algorithms. In *NIPS*, volume 12, page 2004. Cite-seer, 2004. [1](#)
- [6] Yang Liu, Samuel Albanie, Arsha Nagrani, and Andrew Zisserman. Use what you have: Video retrieval using representations from collaborative experts. *arXiv preprint arXiv:1907.13487*, 2019. [1](#)
- [7] Huaishao Luo, Lei Ji, Ming Zhong, Yang Chen, Wen Lei, Nan Duan, and Tianrui Li. Clip4clip: An empirical study of clip for end to end video clip retrieval. *arXiv preprint arXiv:2104.08860*, 2021. [1](#)
- [8] Junwei Ma, Satya Krishna Gorti, Maksims Volkovs, Ilya Stanevich, and Guangwei Yu. Cross-class relevance learning for temporal concept localization. *arXiv preprint arXiv:1911.08548*, 2019. [1](#)
- [9] Mandela Patrick, Po-Yao Huang, Yuki Asano, Florian Metze, Alexander Hauptmann, Joao Henriques, and Andrea Vedaldi. Support-set bottlenecks for video-text representation learning. *arXiv preprint arXiv:2010.02824*, 2020. [1](#)
- [10] Jesús Andrés Portillo-Quintero, José Carlos Ortiz-Bayliss, and Hugo Terashima-Marín. A straightforward framework for video retrieval using clip. In *Mexican Conference on Pattern Recognition*, pages 3–12. Springer, 2021. [1](#)
- [11] Youngjae Yu, Jongseok Kim, and Gunhee Kim. A joint sequence fusion model for video question answering and retrieval. In *Proceedings of the European Conference on Computer Vision (ECCV)*, pages 471–487, 2018. [1](#)
